# Supplementary material for: Anthranilate Fluorescence Marks a Calcium-Propagated Necrotic Wave That Promotes Organismal Death in C. elegans
Source: PubMed Central journal article supplement (PMC3720247; doi:10.1371/journal.pbio.1001613), 2013-07-23

**A**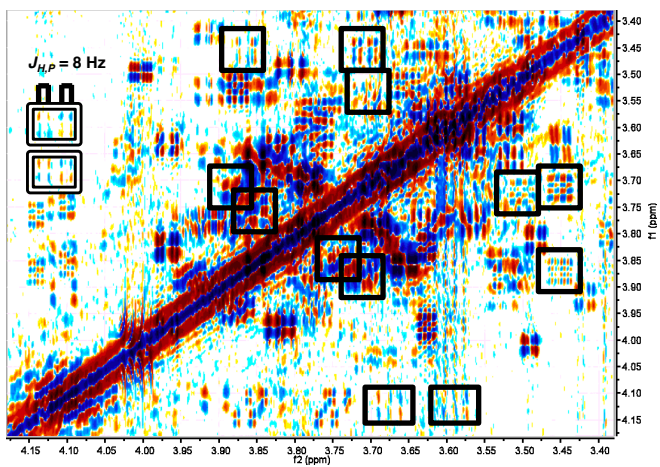**B**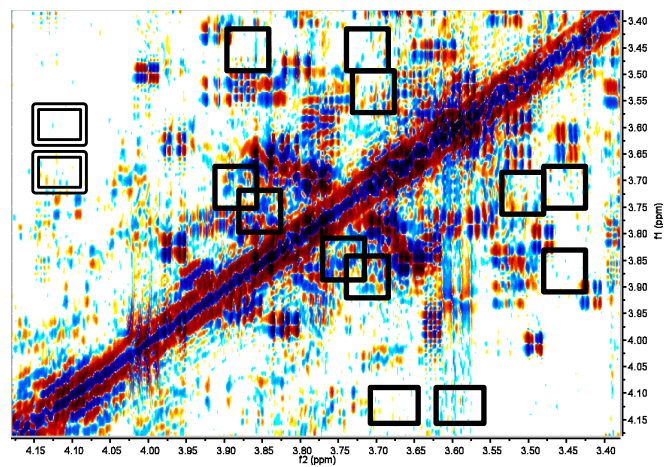**C**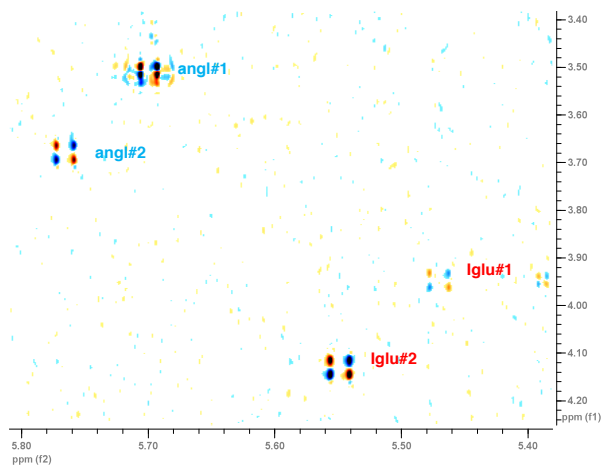**D**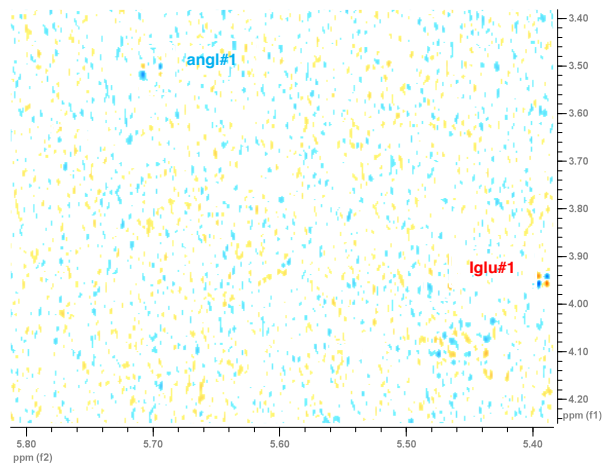

Supplement: pbio.1001613.s007.pdf [file pbio.1001613.s007.pdf]
